# Supplementary material
Source: PubMed Central journal article supplement (PMC10503264)

# THE LANCET

## Infectious Diseases

### Supplementary appendix

This appendix formed part of the original submission and has been peer reviewed. We post it as supplied by the authors.

Supplement to: Wilkinson AL, Zaman K, Hoque M, et al. Immunogenicity of novel oral poliovirus vaccine type 2 administered concomitantly with bivalent oral poliovirus vaccine: an open-label, non-inferiority, randomised, controlled trial. *Lancet Infect Dis* 2023; published online May 10. [https://doi.org/10.1016/S1473-3099\(23\)00139-1](https://doi.org/10.1016/S1473-3099(23)00139-1).

## **Supplementary appendix**

|                                                                                                                                       |               |
|---------------------------------------------------------------------------------------------------------------------------------------|---------------|
| <b>Supplementary Table 1: Reciprocal neutralizing antibody titers, intention-to-treat population</b>                                  | <b>page 2</b> |
| <b>Supplementary Figure 1: Reverse cumulative distribution curves, intention-to-treat population</b>                                  | <b>page 3</b> |
| <b>Supplementary Table 2: Immune response for poliovirus types 1, 2, and 3 by study group, per-protocol population</b>                | <b>page 4</b> |
| <b>Supplementary Figure 2: Non-inferiority assessment of immune response to poliovirus types 1, 2, and 3, per-protocol population</b> | <b>page 5</b> |

**Supplementary Table 1: Reciprocal neutralizing antibody titers for poliovirus types 1, 2, and 3 among immune responders, by study group, intention-to-treat population**

|                                           | <b>Group A (nOPV2 only [n=244])</b> | <b>Group B (nOPV2 and bOPV [n=246])</b> | <b>Group C (bOPV only [n=246])</b> | <b>Kruskal-Wallis test</b> |
|-------------------------------------------|-------------------------------------|-----------------------------------------|------------------------------------|----------------------------|
| <b>Poliovirus type 1</b>                  |                                     |                                         |                                    |                            |
| Antibody titres at 10 weeks after 1 dose  | 2; 151 (83 to 220)                  | 191; ≥1448 (724 to ≥1448)               | 193; ≥1448 (910 to ≥1448)          | B vs C:<br>p=0.076         |
| Antibody titres at 14 weeks after 2 doses | 10; ≥1448 (1045 to ≥1448)           | 227; ≥1448 (1031 to ≥1448)              | 229; ≥1448 (≥1448 to ≥1448)        | B vs C:<br>p=0.079         |
| Antibody titres at 18 weeks after 3 doses | 20; ≥1448 (199 to ≥1448)            | 240; ≥1448 (1152 to ≥1448)              | 240; ≥1448 (≥1448 to ≥1448)        | B vs C:<br>p=0.057         |
| <b>Poliovirus type 2</b>                  |                                     |                                         |                                    |                            |
| Antibody titres at 10 weeks after 1 dose  | 156; 910 (455 to ≥1448)             | 72; 362 (181 to 771)                    | NA                                 | A vs B:<br>p<0.0001        |
| Antibody titres at 14 weeks after 2 doses | 209; 910 (455 to ≥1448)             | 159; 576 (228 to ≥1448)                 | 5; 28 (18 to 91)                   | A vs B:<br>p=0.0007        |
| Antibody titres at 18 weeks after 3 doses | 225; 1152 (576 to ≥1448)            | 193; 576 (228 to ≥1448)                 | 20; 26 (11 to 114)                 | A vs B:<br>p<0.0001        |
| <b>Poliovirus type 3</b>                  |                                     |                                         |                                    |                            |
| Antibody titres at 10 weeks after 1 dose  | 3; 144 (79 to 796)                  | 160; 724 (455 to 1152)                  | 148; 910 (576 to ≥1448)            | B vs C:<br>p=0.11          |
| Antibody titres at 14 weeks after 2 doses | 6; 516 (222 to 687)                 | 216; 724 (288 to 1226)                  | 212; 910 (362 to ≥1448)            | B vs C:<br>p=0.026         |
| Antibody titres at 18 weeks after 3 doses | 8; 817 (432 to 910)                 | 233; 817 (362 to ≥1448)                 | 231; 1152 (455 to ≥1448)           | B vs C:<br>p=0.0092        |

Data are the number of vaccine responders (n) and the median (IQR) of reciprocal antibody titers among vaccine responders. P values are reported for comparisons of interest (i.e., they include comparisons between study vaccines without a specific serotype). nOPV2 = novel oral poliovirus vaccine type 2; bOPV = bivalent oral poliovirus; NA = not applicable, no vaccine responders.

**Supplementary Figure 1: Reverse cumulative distribution curves of reciprocal neutralizing antibody titres to poliovirus types 1, 2, and 3 by study group and time, intention-to-treat population.** (A–I) Proportion of participants (y-axis) with measured reciprocal neutralizing antibody and greater (x-axis) among immune responders at 10, 14, and 18 weeks of age by poliovirus type. nOPV2 = novel oral poliovirus vaccine type 2; bOPV = bivalent oral poliovirus.

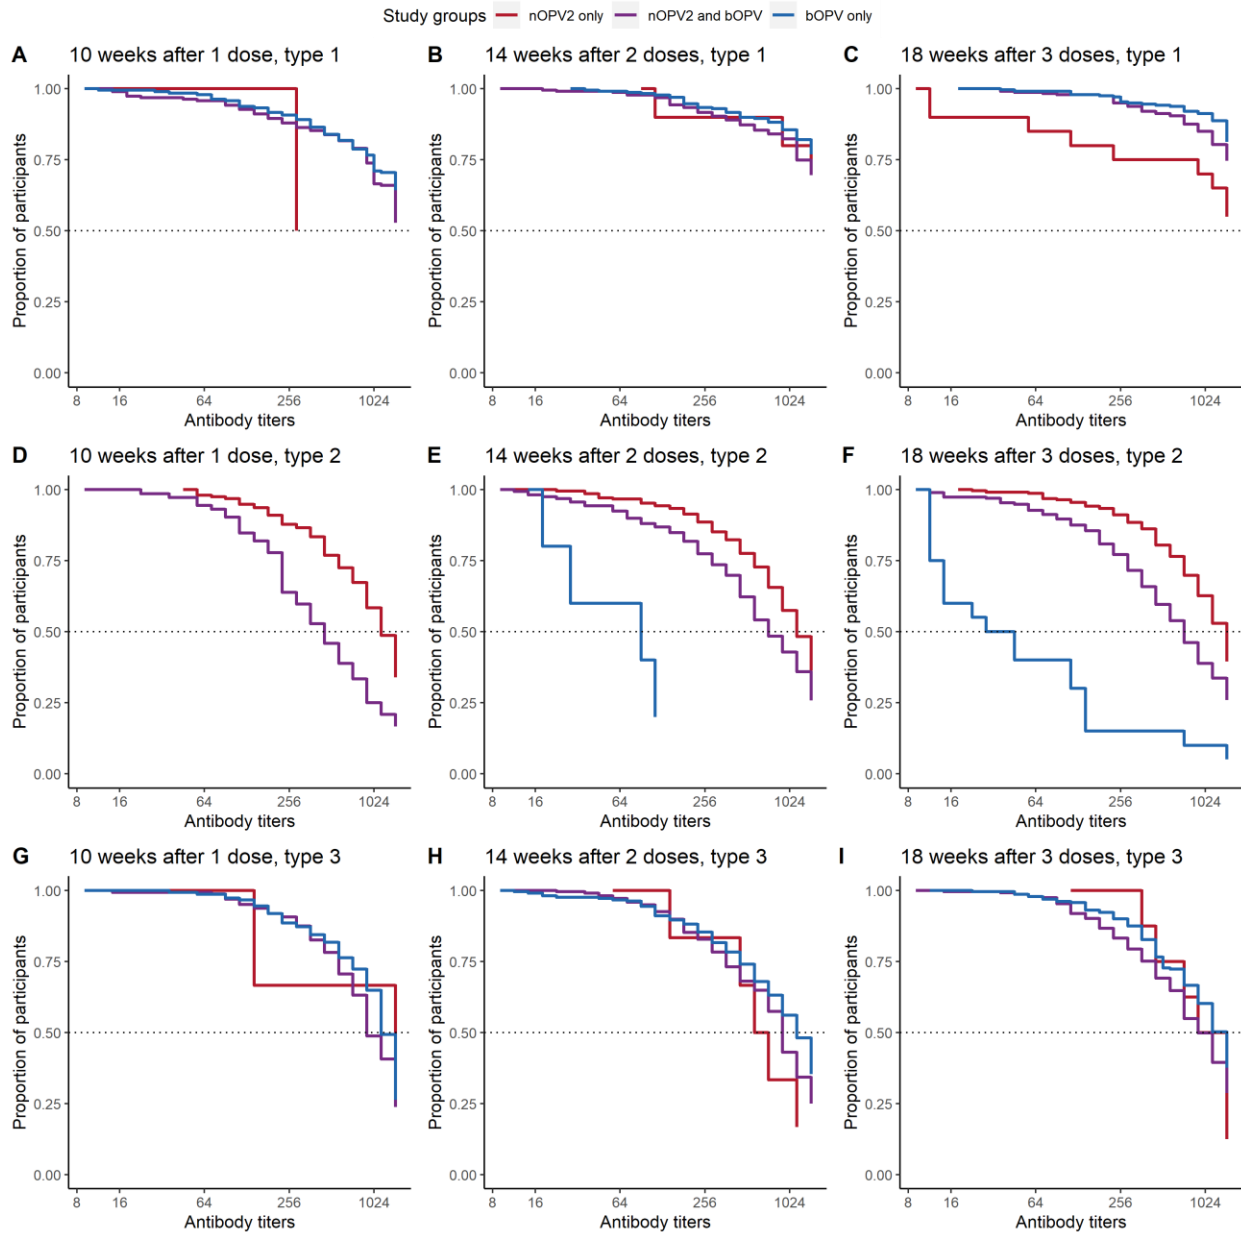

**Supplementary Table 2: Immune response for poliovirus types 1, 2, and 3 by study group, per-protocol population**

|                                                      | <b>Group A<br/>(nOPV2 only<br/>[n=230])</b> | <b>Group B<br/>(nOPV2 and<br/>bOPV [n=225])</b> | <b>Group C (bOPV<br/>only [n=231])</b> |
|------------------------------------------------------|---------------------------------------------|-------------------------------------------------|----------------------------------------|
| <b>Poliovirus type 1</b>                             |                                             |                                                 |                                        |
| Immune response at 10 weeks after 1 dose             | 2 (1%, 0-3)                                 | 173 (77%, 71-82)                                | 183 (79%, 74-84)                       |
| Cumulative immune response by 14 weeks after 2 doses | 10 (4%, 2-8)                                | 208 (92%, 88-95)                                | 215 (93%, 89-96)                       |
| Cumulative immune response by 18 weeks after 3 doses | 20 (9%, 6-13)                               | 220 (98%, 95-99)                                | 225 (97%, 94-99)                       |
| <b>Poliovirus type 2</b>                             |                                             |                                                 |                                        |
| Immune response at 10 weeks after 1 dose             | 147 (64%, 58-70)                            | 66 (29%, 24-36)                                 | 0 (0%, 0-2)                            |
| Cumulative immune response by 14 weeks after 2 doses | 196 (85%, 80-89)                            | 148 (66%, 59-72)                                | 4 (2%, 1-4)                            |
| Cumulative immune response by 18 weeks after 3 doses | 211 (92%, 87-95)                            | 179 (80%, 74-84)                                | 17 (7%, 5-11)                          |
| <b>Poliovirus type 3</b>                             |                                             |                                                 |                                        |
| Immune response at 10 weeks after 1 dose             | 3 (1%, 0-4)                                 | 144 (64%, 58-70)                                | 140 (61%, 54-67)                       |
| Cumulative immune response by 14 weeks after 2 doses | 6 (3%, 1-6)                                 | 196 (87%, 82-91)                                | 200 (87%, 82-90)                       |
| Cumulative immune response by 18 weeks after 3 doses | 8 (3%, 2-7)                                 | 213 (95%, 91-97)                                | 218 (94%, 91-97)                       |

Data are the number of vaccine responders (% , 95% CI). nOPV2 = novel oral poliovirus vaccine type 2; bOPV = bivalent oral poliovirus vaccine.

**Supplementary Figure 2: Non-inferiority assessment of immune response to poliovirus types 1, 2, and 3, per-protocol population**

Differences in vaccine response are presented along with 90% CIs around the estimated difference. Dashed line represents the non-inferiority margin, defined as -10%. Non-inferiority is concluded if the lower bound of the 90% CI falls to the right of the non-inferiority margin. (A) Type 1, nOPV2 and bOPV (Group B) in comparison with bOPV only (Group C), (B) Type 2, nOPV2 and bOPV (Group B) in comparison with nOPV2 only (Group A), (C) Type 3, nOPV2 and bOPV (Group B) in comparison with bOPV only (Group C). nOPV2 = novel oral poliovirus vaccine type 2; bOPV = bivalent oral poliovirus.

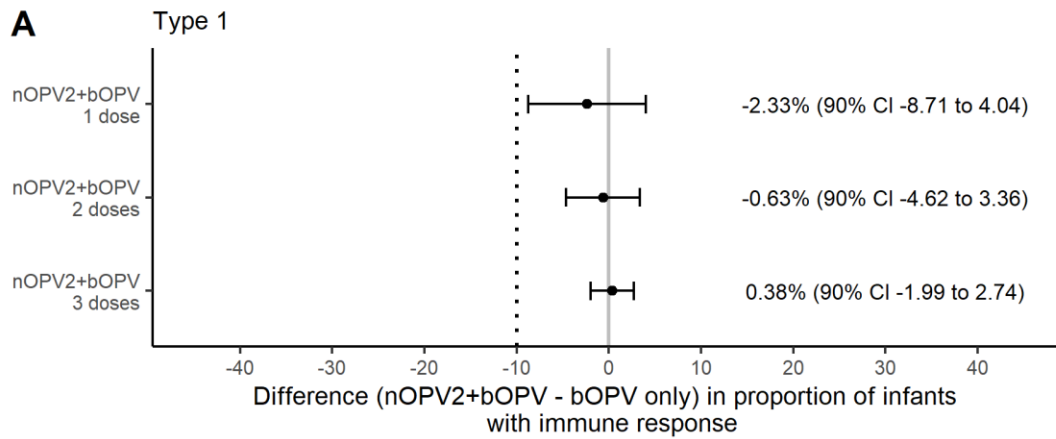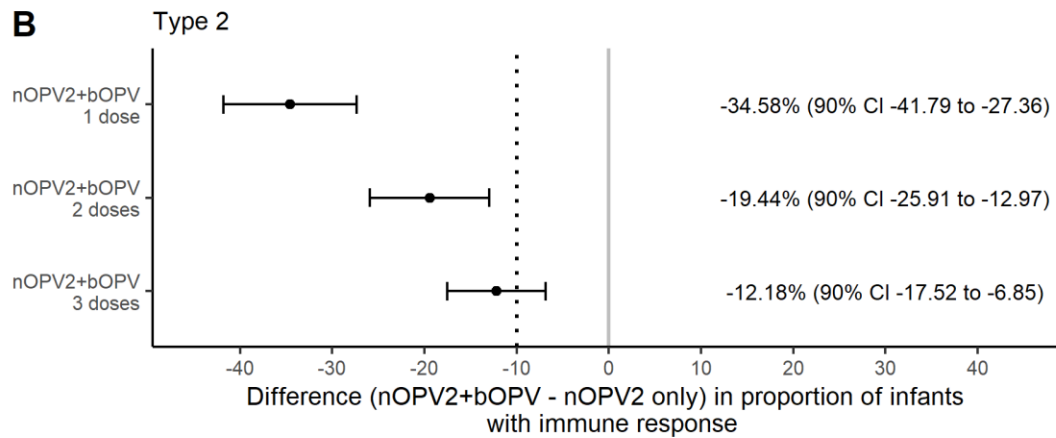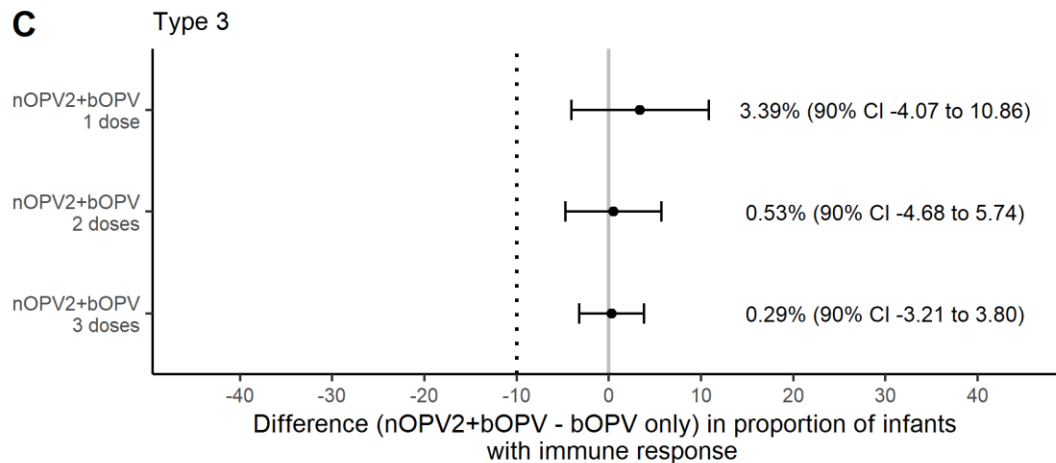

Supplement: NIHMS1903196-supplement-Supplementary_appendix.pdf [file NIHMS1903196-supplement-Supplementary_appendix.pdf]
